# Supplementary material for: Evaluating Access to Prescription Medications in the Atopic Dermatitis Patient Population in the USA
Source: PubMed Central journal article supplement — Dermatol Ther (Heidelb). 2024 Jun 16;14(7):1811–21. doi: 10.1007/s13555-024-01205-0 (PMC11264656; doi:10.1007/s13555-024-01205-0), 2024-06-16
Supplement: 13555_2024_1205_MOESM1_ESM.pdf [file 13555_2024_1205_MOESM1_ESM.pdf]

## SUPPLEMENTARY MATERIAL

### Evaluating Access to Prescription Medications in the Atopic Dermatitis Patient Population in the United States

#### Authors:

Allison R. Loiselle, PhD<sup>1</sup>  
Raj Chovatiya, MD, PhD, MSCI<sup>2</sup>  
Isabelle J. Thibau, MPH<sup>1</sup>  
Jessica K. Johnson, MPH<sup>1</sup>  
Michele Guadalupe, MPH<sup>1</sup>  
Wendy Smith Begolka, MBS<sup>1</sup>

<sup>1</sup> National Eczema Association, 505 San Marin Drive, #B300 Novato, CA 94945 USA

<sup>2</sup> Department of Dermatology, Northwestern University Feinberg School of Medicine, Chicago, IL, 60611, USA

#### Corresponding author:

Wendy Smith Begolka  
National Eczema Association  
505 San Marin Drive, #B300 Novato, CA 94945 USA  
[wendy@nationaleczema.org](mailto:wendy@nationaleczema.org)

Supplementary Table 1: AD Prescriptions included by drug class

| Class              | Medications included                                                                                                                                                                                                                                                                                                                                                                                                                                                                                                                                                                                                                                                                                                                                                                                                                                                                                                                                                                                                                                                                                                                                                                                                                                                                                                                                                                                                                                                                                                                                                                                                                                                                                                                 |
|--------------------|--------------------------------------------------------------------------------------------------------------------------------------------------------------------------------------------------------------------------------------------------------------------------------------------------------------------------------------------------------------------------------------------------------------------------------------------------------------------------------------------------------------------------------------------------------------------------------------------------------------------------------------------------------------------------------------------------------------------------------------------------------------------------------------------------------------------------------------------------------------------------------------------------------------------------------------------------------------------------------------------------------------------------------------------------------------------------------------------------------------------------------------------------------------------------------------------------------------------------------------------------------------------------------------------------------------------------------------------------------------------------------------------------------------------------------------------------------------------------------------------------------------------------------------------------------------------------------------------------------------------------------------------------------------------------------------------------------------------------------------|
| Steroids (topical) | <p>Low Potency Corticosteroids (ointments, gels, creams, foams) Examples [Hydrocortisone 2.5% (Hytone cream/lotion), Hydrocortisone 1% (Many over-the-counter brands of creams, ointments, lotions), Hydrocortisone acetate 0.5% and 1% (Anusol-HC, Proctocream-HC, Proctosol HC cream), Desonide 0.05% (LoKara lotion, Desonate gel, Desowen cream, ointment), Fluocinolone acetonide 0.025% (Synalar cream, solution, shampoo), Hydrocortisone butyrate 0.1% (Locoid cream, lotion, solution).]</p> <p>Moderate Potency Corticosteroids (ointments, gels, creams, foams) Examples [Hydrocortisone valerate 0.2% (Westcort cream, ointment), Hydrocortisone butyrate 0.1% (Locoid ointment), Prednicarbate 0.1% (Dermatop cream, ointment), Hydrocortisone probutate 0.1% (Pandel cream), Fluocinolone acetonide 0.025% (Synalar cream, ointment), Flurandrenolide 0.05% (Cordran cream, ointment, lotion), Triamcinolone acetonide 0.1% (Triderm cream, ointment, lotion), Mometasone furoate 0.1% (Elocon cream, lotion, solution), Fluticasone propionate 0.05% (Cutivate cream).]</p> <p>High Potency Corticosteroids (ointments, gels, creams, foams) Examples [Amcinonide 0.1% (Cyclocort cream, lotion), Mometasone furoate 0.1% (Elocon ointment), Fluticasone propionate 0.005% (Cutivate ointment), Betamethasone dipropionate 0.05% (Betanate cream), Triamcinolone acetonide 0.5% (Kenalog cream, ointment), Fluocinonide 0.05% (Lidex cream, gel, ointment, solution), Halcinonide 0.1% (Halog cream, ointment, solution), Amcinonide 0.1% (Cyclocort ointment), Desoximetasone 0.25% (Topicort cream, ointment).]</p> <p>Ultra High Potency Corticosteroids (ointments, gels, creams, foams) Examples [Clobetasol</p> |

|                            |                                                                                                                                                                                                                                                                                |
|----------------------------|--------------------------------------------------------------------------------------------------------------------------------------------------------------------------------------------------------------------------------------------------------------------------------|
|                            | propionate 0.05% (Temovate), Halobetasol propionate 0.05% (Ultravate cream, ointment, lotion), Diflorasone diacetate 0.05% (Psorcon ointment), Betamethasone dipropionate 0.25% (Diprolene ointment, gel).]                                                                    |
| Steroids (oral/injectable) | <p>Oral corticosteroids [(e.g., prednisone, methylprednisolone (Medrol)] Examples [Cortisone Acetate, Dexamethasone, Hydrocortisone, Methylprednisolone, Prednisolone, Prednisone.]</p> <p>Injectable corticosteroids [e.g., prednisone, triamcinolone (Kenalog)]</p>          |
| Topicals                   | <p>Tacrolimus (i.e., Protopic, Prograf)</p> <p>Pimecrolimus (i.e., Elidel)</p> <p>Crisaborole (i.e., Eucrisa)</p> <p>Topical Antimicrobials (i.e., antibiotics or antivirals)</p> <p>Phototherapy (UVB and /or UVA)</p>                                                        |
| Orals                      | <p>Azathioprine (i.e., Imuran, Azasan)</p> <p>Cyclosporine (i.e., Gengraf, Neoral, SandIMMUNE)</p> <p>Methotrexate (i.e., Otrexup, Rasuvo, Rheumatrex, Trexall)</p> <p>Mycophenolate mofetil (i.e., CellCept)</p> <p>Oral Antimicrobials (i.e., antibiotics or antivirals)</p> |
| Biologics (injectable)     | Dupilumab (i.e., Dupixent)                                                                                                                                                                                                                                                     |
